# Supplementary material for: Integrated analysis of circRNA-miRNA-mRNA network reveals potential prognostic biomarkers for radiotherapies with X-rays and carbon ions in non-small cell lung cancer
Source: PubMed Central journal article supplement — Ann Transl Med. 2020 Nov;8(21):1373. doi: 10.21037/atm-20-2002 (PMC7723558; doi:10.21037/atm-20-2002), 2020-11
Supplement: atm-08-21-1373-supplementary.pdf [file atm-08-21-1373-supplementary.pdf]

**Table S1** The primers used for the PCR validation

| Gene                           | Forward and reverse primers                                      | Length (bp) |
|--------------------------------|------------------------------------------------------------------|-------------|
| <i>hsa_circ_0109301</i>        | F: 5'-ATGGTGAAGAATCCCCAGTTAT-3'; R: 5'-GGCCACATCCCTAAATGTCAA-3'  | 125         |
| <i>hsa_circ_0000586</i>        | F: 5'-GACGACATTGAAGCTAGCCG-3'; R: 5'-GCCAAACTTCTGAGGAGCTG-3'     | 89          |
| <i>hsa_circ_0008012</i>        | F: 5'-GGACTACCTGGTGCCTCTAG-3'; R: 5'-TGGATCATCTTCTGCCATTCTG-3'   | 79          |
| <i>hsa_circ_0008543</i>        | F: 5'-TTGATGACCTGTCTGGAGCAA-3'; R: 5'-AATGTCAACACTCCCTGGGT-3'    | 100         |
| <i>hsa_circ_0008749</i>        | F: 5'-TGTGGGAATGCATGAAAGG-3'; R: 5'-ATTCAGTTGCCCGCCATTC-3'       | 79          |
| <i>hsa_circ_0030389</i>        | F: 5'-GCCTCTGGTGTAGCTGGAAT-3'; R: 5'-TCATAGCGTAGAGAGTTTCCCA-3'   | 87          |
| <i>hsa_circ_0001944</i>        | F: 5'-TCTGTTCCCAATACAAGAAGACTC-3'; R: 5'-AGGCTGAGGCAGGAGAATAG-3' | 207         |
| <i>hsa_circ_0044833</i>        | F: 5'-TGACTIONCAGTGATGACGCAG-3'; R: 5'-GCAGTTTCCGCAGATCCATC-3'   | 79          |
| <i>hsa_circ_0007161</i>        | F: 5'-TTCCAGTGGATGCCCATCAG-3'; R: 5'-CACCTCCTTCTTCAAGAAACTT-3'   | 144         |
| <i>hsa_circ_0002945</i>        | F: 5'-CTGGAGGTGGCTTGGACTC-3'; R: 5'-TATGGGCTTCGCAGGAGAAA-3'      | 102         |
| <i>chr19:15280897-15281636</i> | F: 5'-AACATGGCCAAGGGTGAGAG-3'; R: 5'-CAGAGCCGGTTGTCAATCTC-3'     | 119         |
| <i>hsa_circ_0009158</i>        | F: 5'-TGTGGAAGAACAGCAGGAAG-3'; R: 5'-CTCCCTCAACATGTTCTGCG-3'     | 205         |
| <i>hsa_circ_0007781</i>        | F: 5'-CGCAGCCAATGATAGACCAC-3'; R: 5'-TGTCTCCCCACATTCTCCTG-3'     | 138         |
| <i>hsa_circ_0046534</i>        | F: 5'-CGCAGCCAATGATAGACCAC-3'; R: 5'-TGTCTCCCCACATTCTCCTG-3'     | 212         |
| <i>hsa_circ_0084606</i>        | F: 5'-TGTGGAAGAACAGCAGGAAG-3'; R: 5'-CTCCCTCAACATGTTCTGCG-3'     | 247         |
| <i>chr11:27412641-27434407</i> | F: 5'-GGCCTTGTCTGGGTGAAAG-3'; R: 5'-CCCGCCAATTGTAGCTCTTC-3'      | 188         |
| <i>hsa_circ_0035277</i>        | F: 5'-ATATACCCGAAACAGCCT-3'; R: 5'-ACTTGTGGCTTTACTGTGGC-3'       | 135         |
| <i>hsa_circ_0080085</i>        | F: 5'-TGCTGGACCCAACACAAATG-3'; R: 5'-ACGATCAGGGGTAACAGCT-3'      | 179         |
| <i>hsa_circ_0037955</i>        | F: 5'-TTTGTTCCTTAGCCAGCC-3'; R: 5'-TGGGGAATGTCACATGGAGA-3'       | 135         |
| <i>hsa_circ_0087232</i>        | F: 5'-CCGGATGATGATGGCAAGAC-3'; R: 5'-TCCGATCTTGGCGTTGAAAG-3'     | 162         |
| <i>GAPDH</i>                   | F: 5'-TCTCTGCTCCTCTGTTCTGA-3'; R: 5'-GCGCCCAATACGACCAAATC-3'     | 122         |

**Table S2** Differentially expressed miRNAs correlated with patient survival significantly

| miRNA ID        | log <sub>2</sub> (fold change) | Prognosis                               |
|-----------------|--------------------------------|-----------------------------------------|
| hsa-miR-429     | -10.7698                       | Low expression suggests poor prognosis  |
| hsa-miR-200a-5p | -8.6713                        | Low expression suggests poor prognosis  |
| hsa-miR-1468-5p | -8.2368                        | Low expression suggests poor prognosis  |
| hsa-miR-34a-3p  | -7.0553                        | Low expression suggests poor prognosis  |
| hsa-miR-142-5p  | -6.2915                        | Low expression suggests poor prognosis  |
| hsa-miR-34b-5p  | -6.1633                        | Low expression suggests poor prognosis  |
| hsa-miR-299-5p  | -5.4152                        | Low expression suggests poor prognosis  |
| hsa-miR-146b-3p | -2.0371                        | Low expression suggests poor prognosis  |
| hsa-miR-365a-5p | -1.9874                        | Low expression suggests poor prognosis  |
| hsa-miR-16-1-3p | -1.643                         | Low expression suggests poor prognosis  |
| hsa-miR-99a-3p  | -1.6329                        | Low expression suggests poor prognosis  |
| hsa-miR-449a    | -1.3207                        | Low expression suggests poor prognosis  |
| hsa-miR-146a-5p | -1.2417                        | Low expression suggests poor prognosis  |
| hsa-miR-548v    | -1.0741                        | Low expression suggests poor prognosis  |
| hsa-miR-199b-5p | -1.0611                        | Low expression suggests poor prognosis  |
| hsa-miR-424-3p  | 1.1499                         | High expression suggests poor prognosis |
| hsa-miR-584-5p  | 1.96                           | High expression suggests poor prognosis |

**Table S3** MiRNA-targeted mRNAs

| Gene            | $\log_2$ (fold change) | P value  |
|-----------------|------------------------|----------|
| <i>FOXL2NB</i>  | -3.67726               | 0.000451 |
| <i>ANXA1</i>    | -1.8883                | 1.43E-06 |
| <i>ATP6V1E2</i> | -1.54805               | 0.000401 |
| <i>SCN9A</i>    | -1.4202                | 0.000901 |
| <i>PLPP3</i>    | -1.34197               | 0.000419 |
| <i>B4GAT1</i>   | 1.250781               | 0.00056  |
| <i>ITGA3</i>    | 1.397485               | 0.000117 |
| <i>NETO2</i>    | 1.489256               | 0.000706 |
| <i>ARSJ</i>     | 1.703083               | 1.1E-05  |
| <i>PIM2</i>     | 1.763272               | 3.35E-05 |
| <i>SOX4</i>     | 1.970212               | 2.18E-08 |
| <i>XK</i>       | 1.971835               | 0.000176 |
| <i>SH3TC2</i>   | 2.115496               | 0.000213 |
| <i>S1PR3</i>    | 2.169896               | 1.16E-07 |
| <i>RTN4RL1</i>  | 2.255763               | 0.000819 |
| <i>TMEM59L</i>  | 2.350886               | 0.000305 |
| <i>COL5A2</i>   | 2.369889               | 1.69E-07 |
| <i>TPPP</i>     | 2.634742               | 6.37E-08 |
| <i>SLC16A7</i>  | 2.853034               | 0.000584 |
| <i>RASL10B</i>  | 2.992356               | 3.41E-05 |
| <i>FBN2</i>     | 3.032016               | 7.88E-05 |
| <i>LMNA</i>     | 3.116185               | 0.000892 |
| <i>RNF144B</i>  | 3.499924               | 0.000761 |
| <i>TOX</i>      | 4.876351               | 0.000226 |
| <i>SHC4</i>     | 5.190201               | 8.22E-07 |
| <i>RPS6KL1</i>  | 5.307752               | 3.5E-16  |
| <i>DLL1</i>     | 5.931623               | 5.98E-08 |
| <i>PXDN</i>     | 7.197225               | 8.9E-17  |
| <i>STK32A</i>   | 7.264389               | 9.36E-06 |
| <i>SEMA3F</i>   | 7.390137               | 1.37E-09 |
| <i>PCDH7</i>    | 7.673314               | 4.07E-11 |
| <i>ZNF736</i>   | 8.052809               | 1.49E-27 |

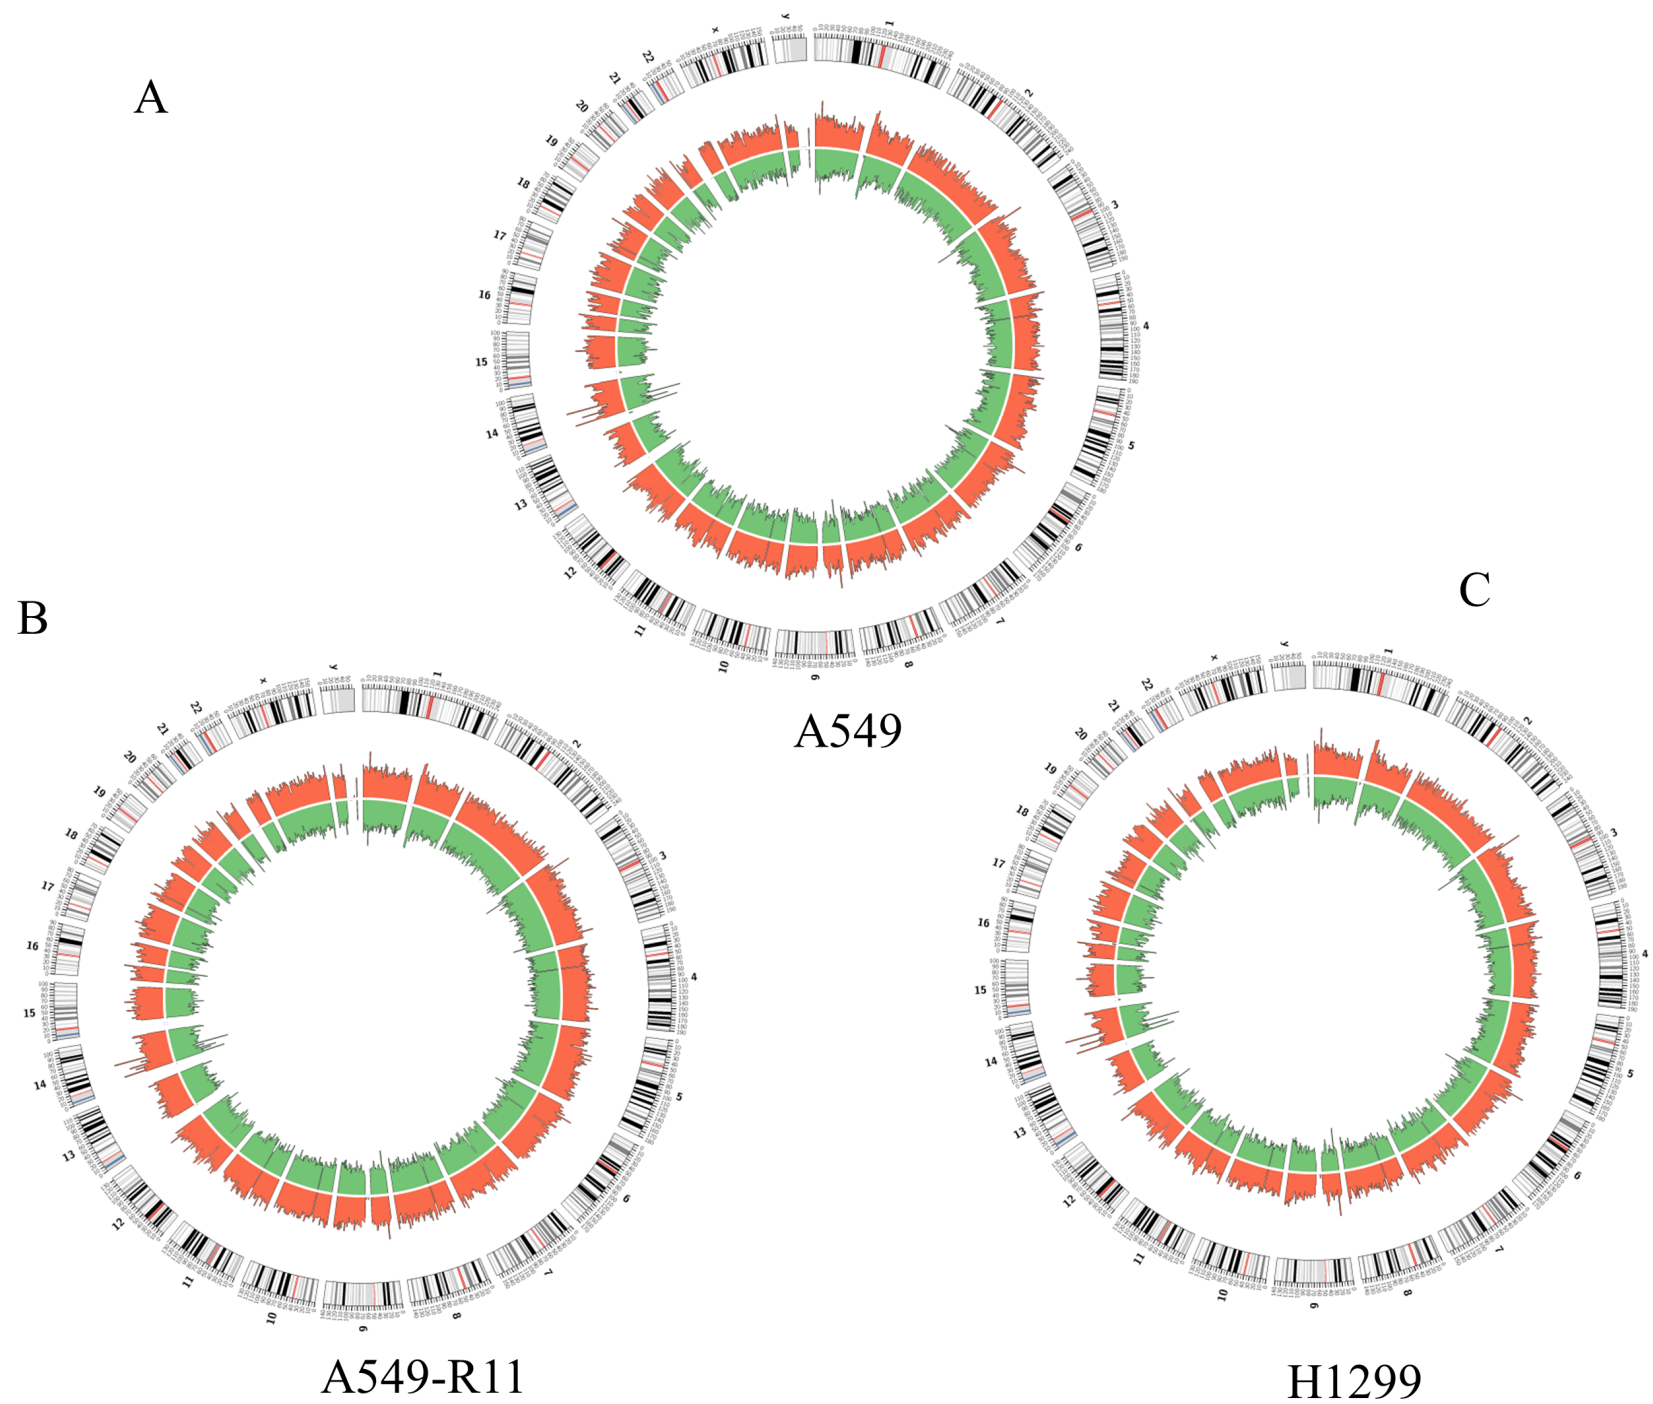

**Figure S1** The distribution of the circRNAs and mRNAs on the chromosomes in A549 (A), A549-R11 (B) and H1299 (C) cells.

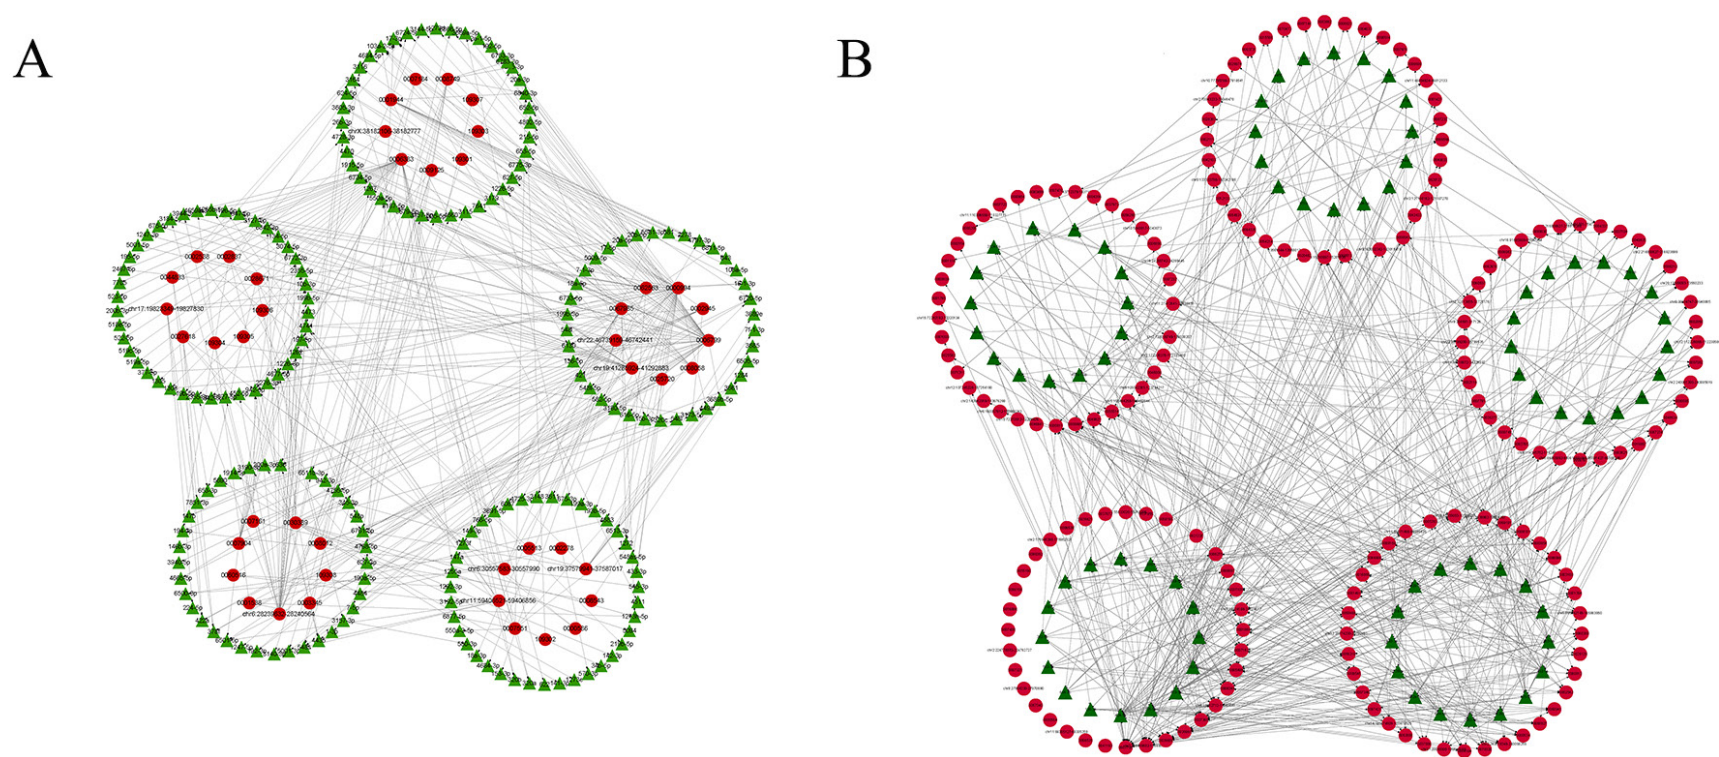

**Figure S2** The circRNA-miRNA interaction networks predicted by the miRanda, RNA hybrid and TargetScan databases. Red symbols represent up-regulated expressions, whereas green ones represent down-regulated expressions. Triangular and oval nodes represent miRNAs and circRNAs, respectively.

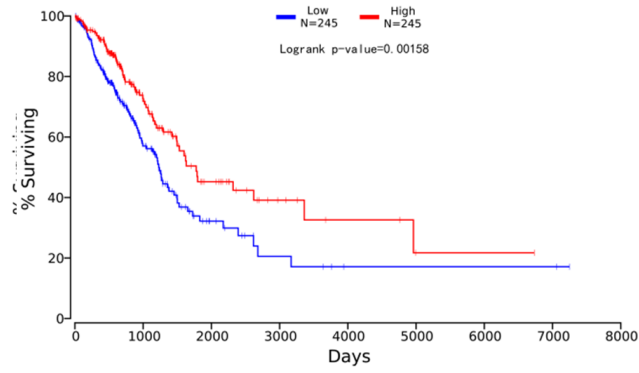

hsa-miR-16-1-3p

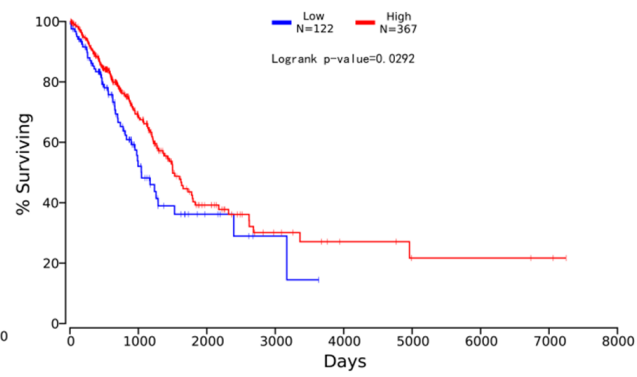

hsa-miR-34b-5p

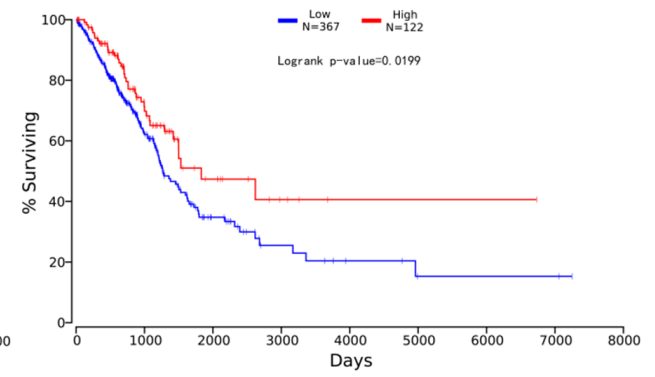

hsa-miR-142-3p

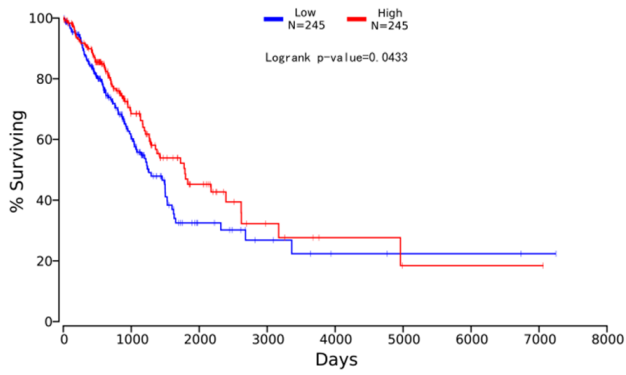

hsa-miR-146b-3p

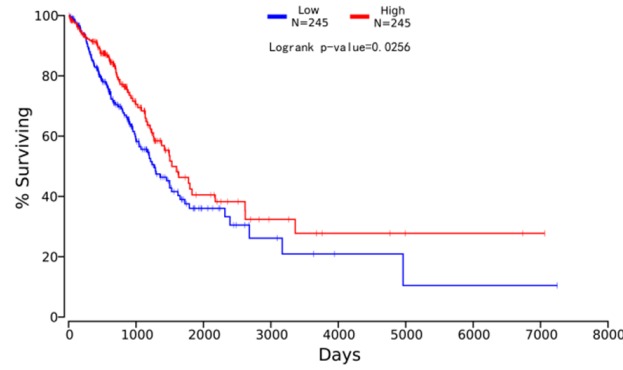

hsa-miR-199b-5p

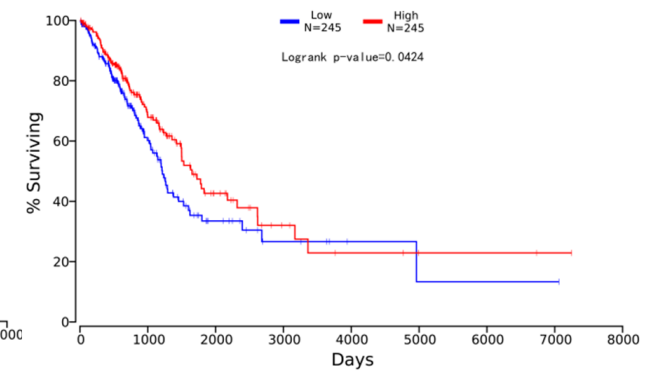

hsa-miR-449a

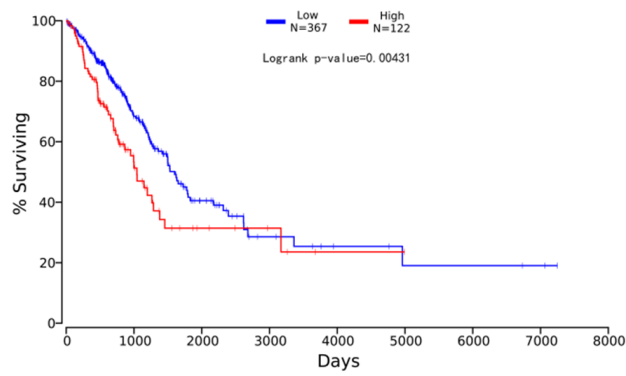

hsa-miR-584-5p

**Figure S3** The significant correlation of the differentially expressed miRNAs with the survival of patients. (A) The low expression suggests poor prognosis. (B) The high expression suggests poor prognosis.  $P < 0.05$ .

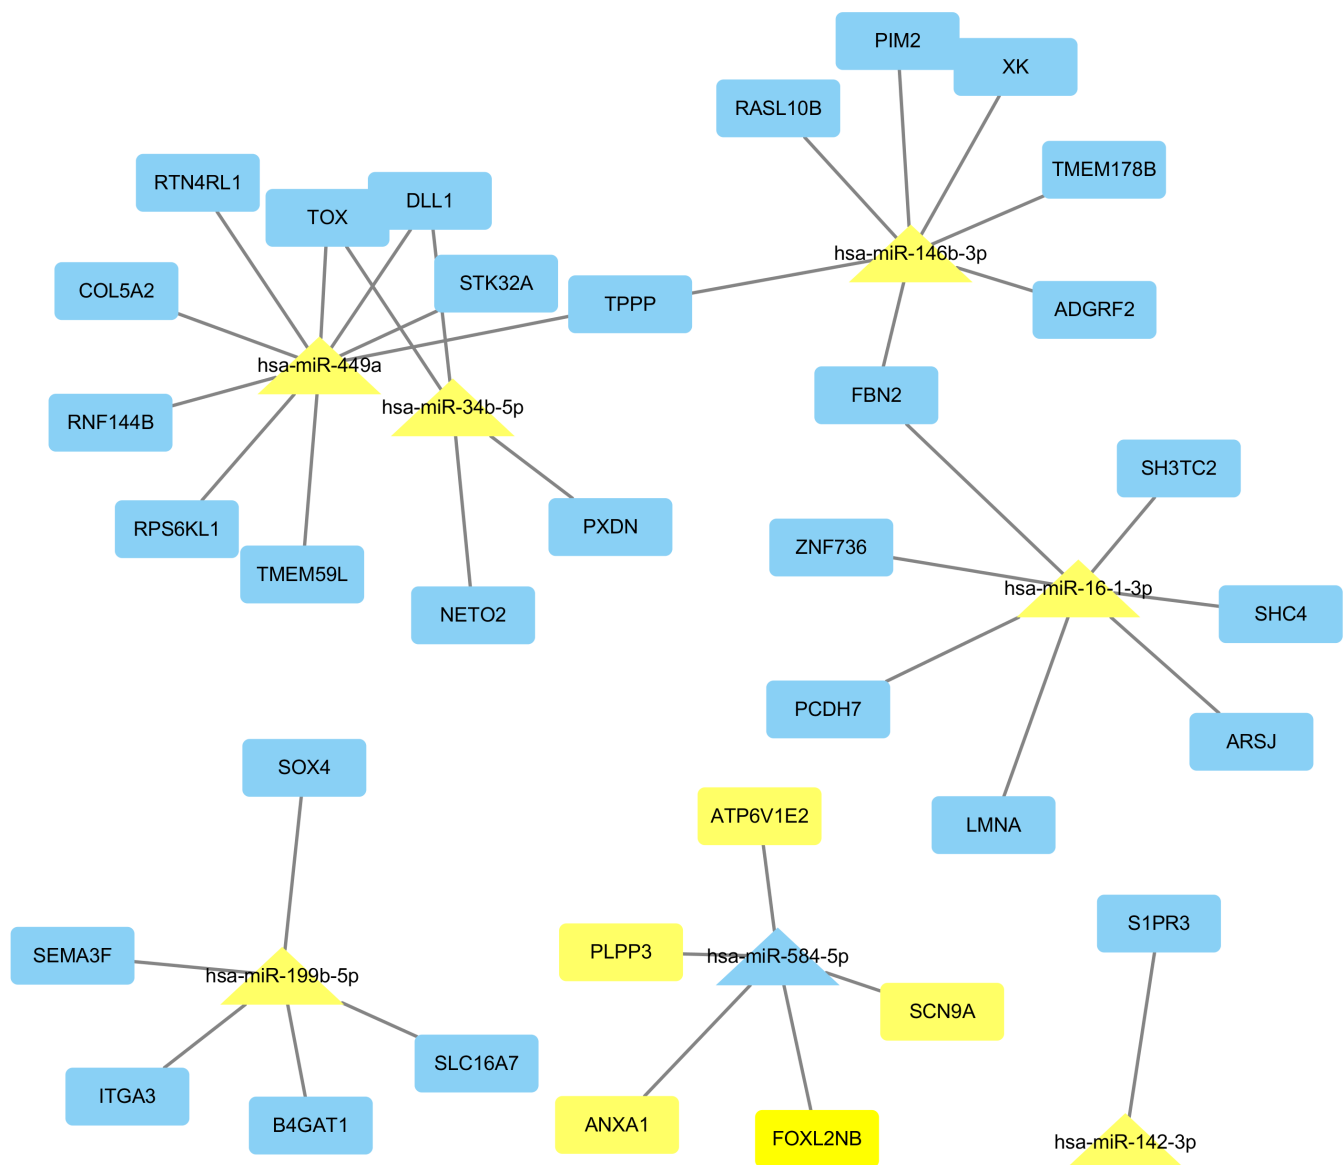

**Figure S4** The predicted miRNA-mRNA interactions. Blue symbols represent up-regulated expressions, whereas yellow symbols represent down-regulated expression. Triangular and quadrilateral nodes represent miRNAs and circRNAs, respectively.

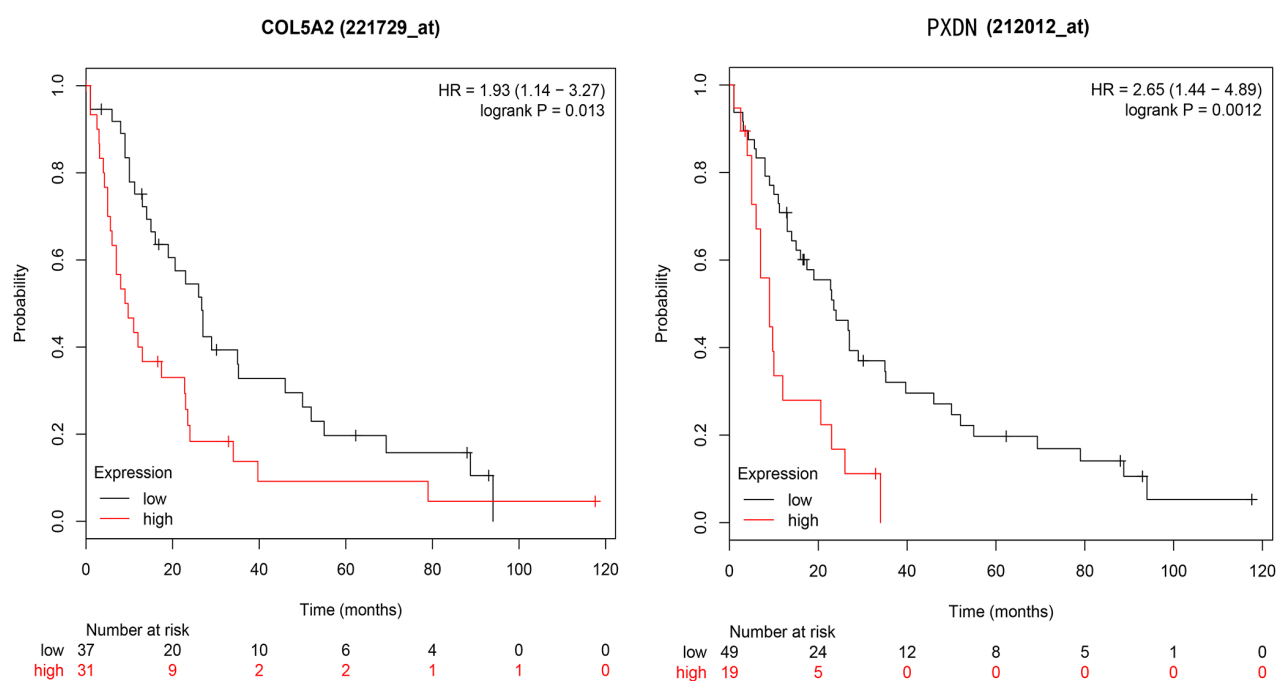

**Figure S4** The predicted miRNA-mRNA interactions. Blue symbols represent up-regulated expressions, whereas yellow symbols represent down-regulated expression. Triangular and quadrilateral nodes represent miRNAs and circRNAs, respectively.
